# Supplementary material for: Decision support for hospital bed management using adaptable individual length of stay estimations and shared resources
Source: Springer Nature journal article supplement (doi:10.1186/1472-6947-13-3), 2013-01-07

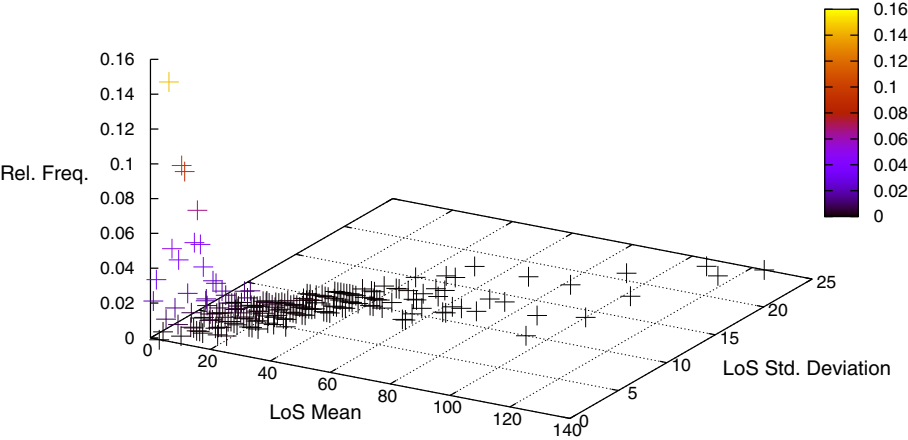

Supplement: 12911_2011_656_MOESM5_ESM.pdf [file 12911_2011_656_MOESM5_ESM.pdf]
